# Supplementary material for: Discrimination of mycoplasma infection using machine learning models trained on autofluorescence signatures of host cells
Source: Royal Society of Chemistry journal article supplement (doi:10.1039/d3sd00175j), 2023-11-23
Supplement: d3sd00175j1.pdf [file d3sd00175j1.pdf]

## Supplementary information

# Discrimination of Mycoplasma Infection Using Machine Learning Models Trained on Autofluorescence Signatures of Host Cells

Kenzo Bamba,<sup>†a</sup> Kyosuke Takabe,<sup>†b</sup> Hiroaki Daitoku,<sup>c</sup> Yoshikazu Tanaka,<sup>a</sup> Azusa Ohtani,<sup>a</sup> Midori Ozawa,<sup>a</sup> Akiyoshi Fukamizu,<sup>c</sup> Nobuhiko Nomura,<sup>bd</sup> Arihiro Kohara,<sup>\*a</sup> and Tatsuki Kunoh<sup>\*b</sup>

<sup>a</sup>JCRB Cell Bank, Center for Drug Discovery Resources Research, National Institutes of Biomedical Innovation, Health and Nutrition, 7-6-8 Saito-Asagi, Ibaraki, Osaka 567-0085, Japan.

<sup>b</sup>Faculty of Life and Environmental Sciences, University of Tsukuba, 1-1-1 Tennodai, Tsukuba, Ibaraki 305-8577, Japan.

<sup>c</sup>Center for Tsukuba Advanced Research Alliance, University of Tsukuba, 1-1-1 Tennodai, Tsukuba, Ibaraki 305-8577, Japan.

<sup>d</sup>Microbiology Research Center for Sustainability, University of Tsukuba, 1-1-1 Tennodai, Tsukuba, Ibaraki 305-8577, Japan.

<sup>†</sup>Equal contribution to this study.

Corresponding Authors: Arihiro Kohara (kohara@nibiohn.go.jp); Tatsuki Kunoh: (kunou.tatsuki@aist.go.jp)

Present addresses: Department of Bacteriology I, National Institute of Infectious Diseases, Toyama, Shinjuku-ku, Tokyo, Japan 162-8640 (KT); Bioproduction Research Institute, National Institute of Advanced Industrial Science and Technology, Higashi, Tsukuba 305-8566, Japan (TK).

**Supplementary table**

| Conditions  | Analyzed cell number |                |
|-------------|----------------------|----------------|
|             | Mycoplasma (–)       | Mycoplasma (+) |
| Trypsinized | 90                   | 166            |
| Adhered     |                      |                |
| 0 day       | 50                   | 51             |
| 1 day       | 16                   | 29             |
| 2 days      | 16                   | 29             |
| 3 days      | 36                   | 21             |
| Total       | 118                  | 130            |

**Table S1.** Analyzed cell numbers for machine learning models.

**Supplementary figures**

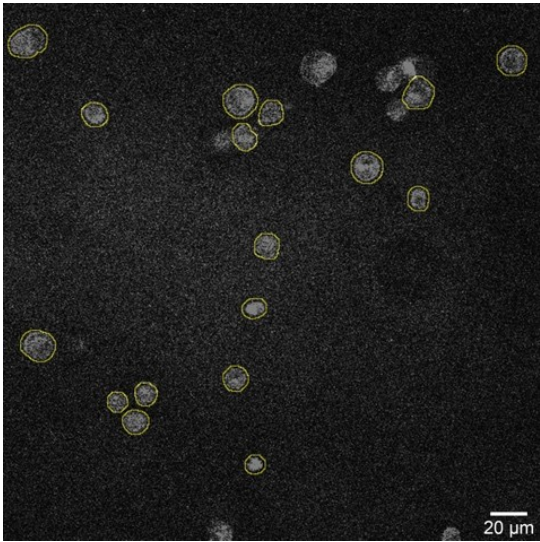

**Figure S1.** Representative image of segmentation showing cell boundaries of individual cells by yellow lines.

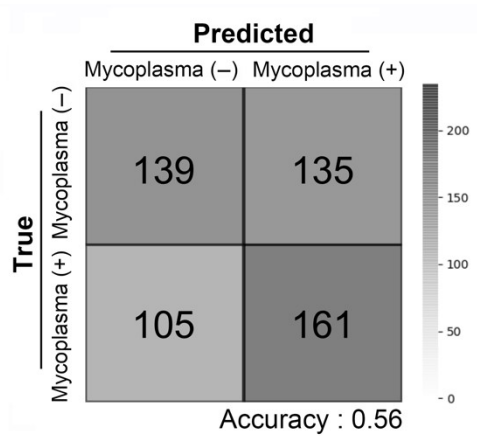

**Figure S2.** Discrimination of mycoplasma infection of dissociated VERO cells using an SVM-supported machine learning model.

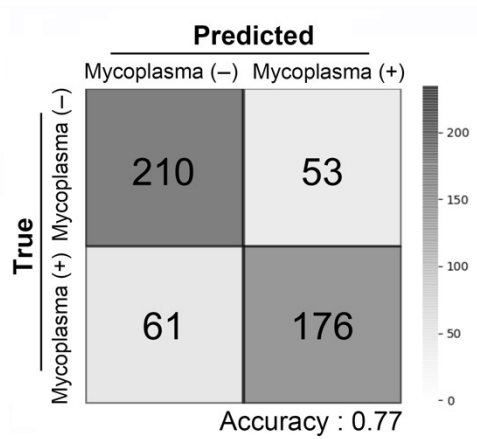

**Figure S3.** Discrimination of mycoplasma infection of adhered VERO cells using an SVM-supported machine learning model.

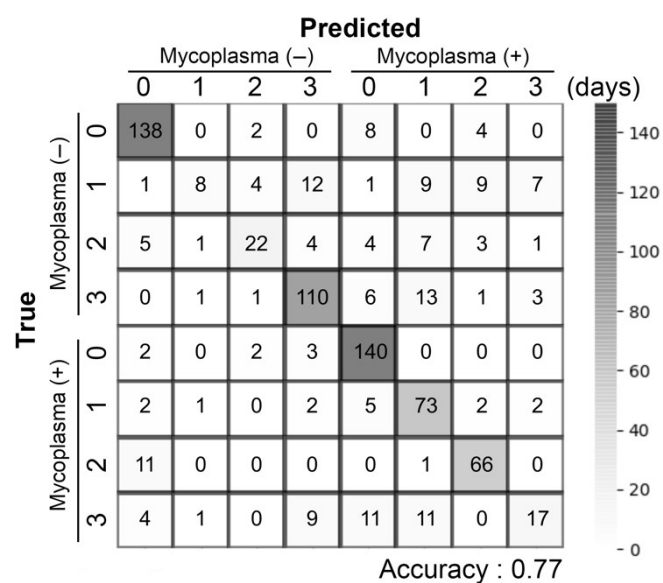

**Figure S4.** Classifying cells across different culture stages. Our neural network-supported machine learning model achieved an accuracy of ~77%.

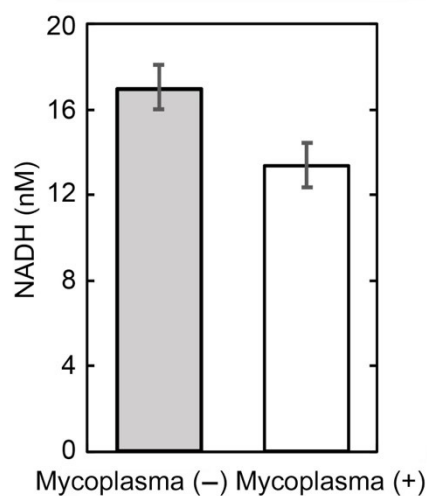

**Figure S5.** Attenuation of cellular NADH levels in host cells by mycoplasma infection. Cellular NADH levels are lower in mycoplasma (+) cells compared to mycoplasma (-) cells ( $p < 0.015$ ).
